# Supplementary material for: Capsular Sialyltransferase Specificity Mediates Different Phenotypes in Streptococcus suis and Group B Streptococcus
Source: PubMed Central journal article supplement (PMC5891629; doi:10.3389/fmicb.2018.00545), 2018-04-03
Supplement: Presentation1.pdf [file Presentation1.pdf]

## *Supplementary Material*

### **Capsular Sialyltransferase Specificity Mediates Different Phenotypes in *Streptococcus suis* and Group B *Streptococcus***

***David Roy, Daisuke Takamatsu, Masatoshi Okura, Guillaume Goyette-Desjardins, Marie-Rose Van Calsteren, Audrey Dumesnil, Marcelo Gottschalk and Mariela Segura\****

**\* Correspondence:**

*Mariela Segura*

*mariela.segura@umontreal.ca*

#### **Supplementary Figures and Tables:**

**Figure S1. NMR COSY spectrum of the GBSIII<sub>sia2,6</sub> mutant CPS.**

**Figure S2. NMR HSQC spectrum of the GBSIII<sub>sia2,6</sub> mutant CPS.**

**Figure S3. NMR COSY spectrum of the GBSV<sub>sia2,6</sub> mutant CPS.**

**Figure S4. NMR HSQC spectrum of the GBSV<sub>sia2,6</sub> mutant CPS.**

**Table S1. Oligonucleotide primers used in this study.**

**Table S2. NMR chemical shifts of the GBSIII<sub>sia2,6</sub> mutant CPS.**

**Table S3. NMR chemical shift differences between the GBSIII<sub>sia2,6</sub> mutant and wild-type GBS type III CPSs.**

**Table S4. NMR chemical shifts of the GBSV<sub>sia2,6</sub> mutant CPS.**

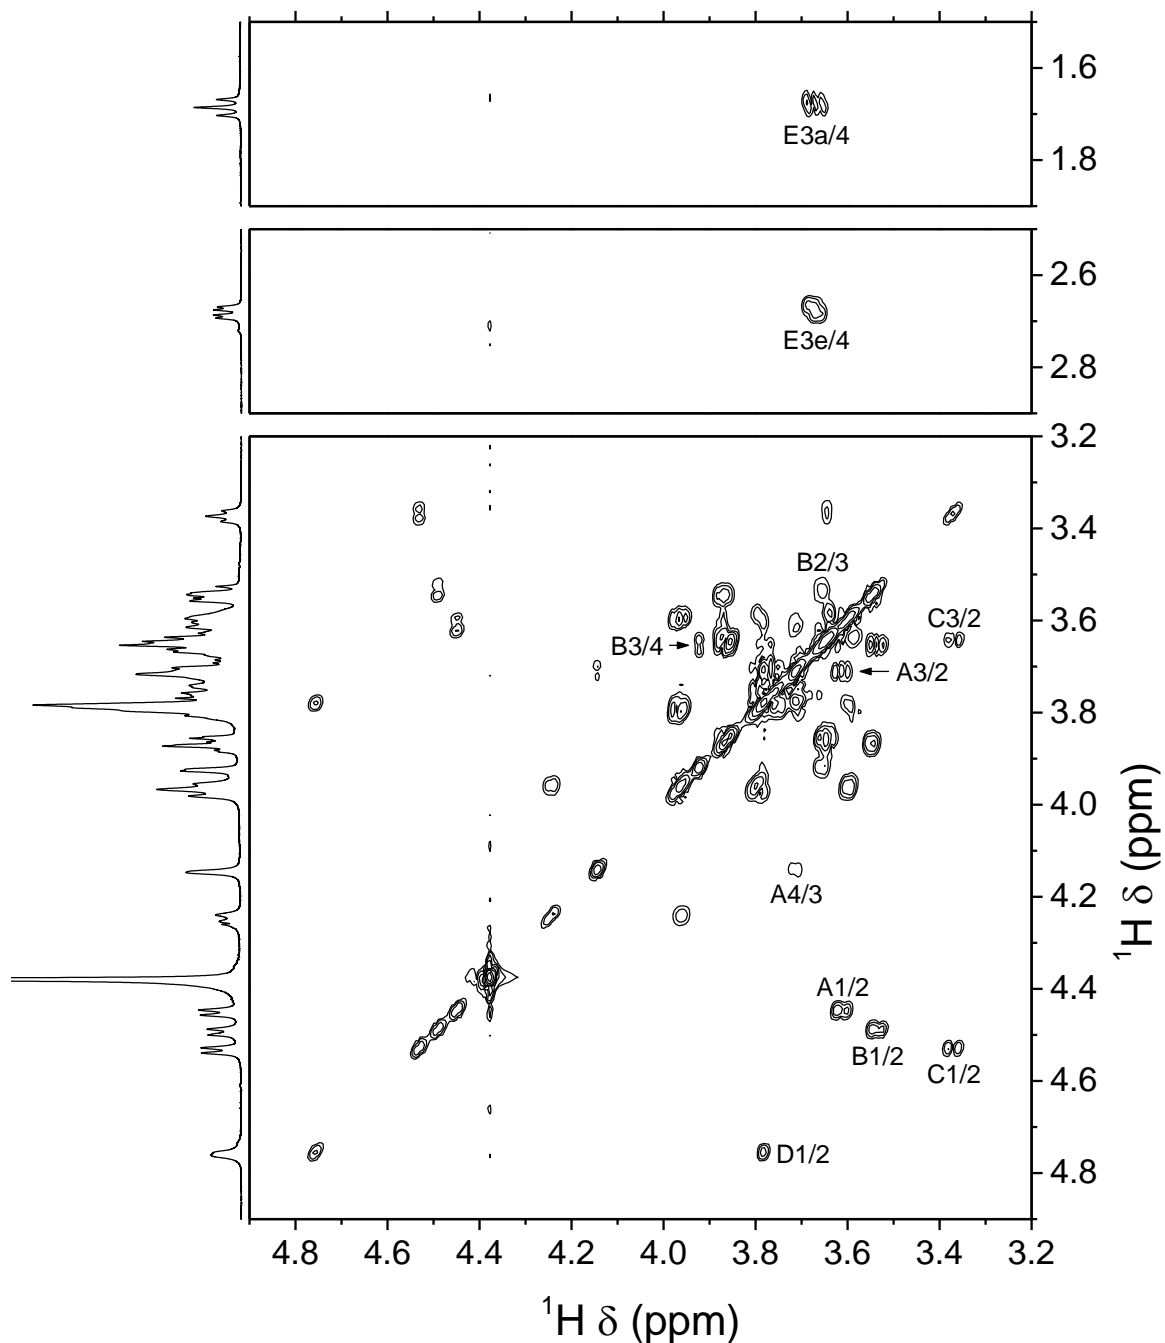

**Supplementary Figure S1. Portions of the 700-MHz 2D NMR COSY spectrum of the GBSIII sia2,6 mutant CPS in 33 mM phosphate pD 8.0 in D<sub>2</sub>O at 65°C.** 512 increments of 2 K complex data points were acquired in magnitude mode with a digital resolution of 3.4 Hz/point in the  $t_2$  dimension and 13.7 Hz/point in the  $t_1$  dimension. The  $t_2$  dimension was processed by multiplication with an unshifted sine bell window function and Fourier transform, and the  $t_1$  dimension was processed by Zhu-Bax linear prediction to 1024 points, multiplication with an unshifted sine bell window function, Fourier transform, and magnitude calculation. The  $f_1$  trace corresponds to the 1D <sup>1</sup>H spectrum (see [Figure 12B](#)).

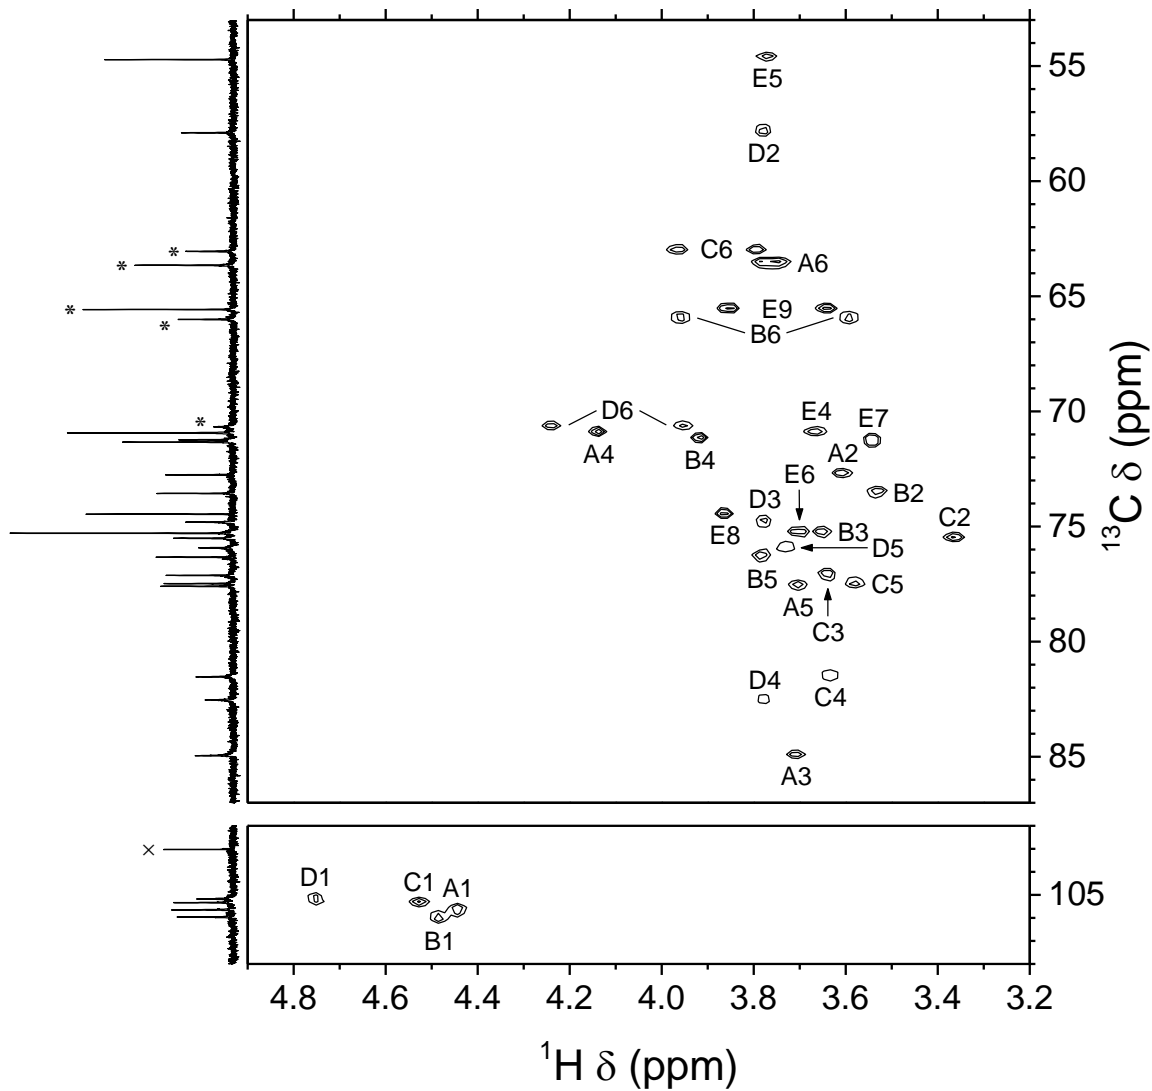

**Supplementary Figure S2. Portions of the 176-MHz ge-2D NMR HSQC spectrum of the GBSIII<sub>sia2,6</sub> mutant CPS in 33 mM phosphate pD 8.0 in D<sub>2</sub>O at 65°C.**  $2 \times 200$  increments of 512 complex data points were acquired in the echo-antiecho mode with a digital resolution of 9.8 Hz/point in the  $t_2$  dimension and 57.3 Hz/point in the  $t_1$  dimension. The  $t_2$  dimension was processed by multiplication with a  $\pi/2$  shifted sine bell window function, Fourier transform, and phase correction, and the  $t_1$  dimension was processed by Zhu-Bax linear prediction to 400 points, multiplication with a  $\pi/2$  shifted sine bell window function, zero filling, Fourier transform, and phase correction. Only positive contours are shown. The  $f_1$  trace corresponds to the 1D  $^{13}\text{C}$  spectrum. \*, signals inverted on the DEPT spectrum; x, signal absent on the DEPT spectrum.

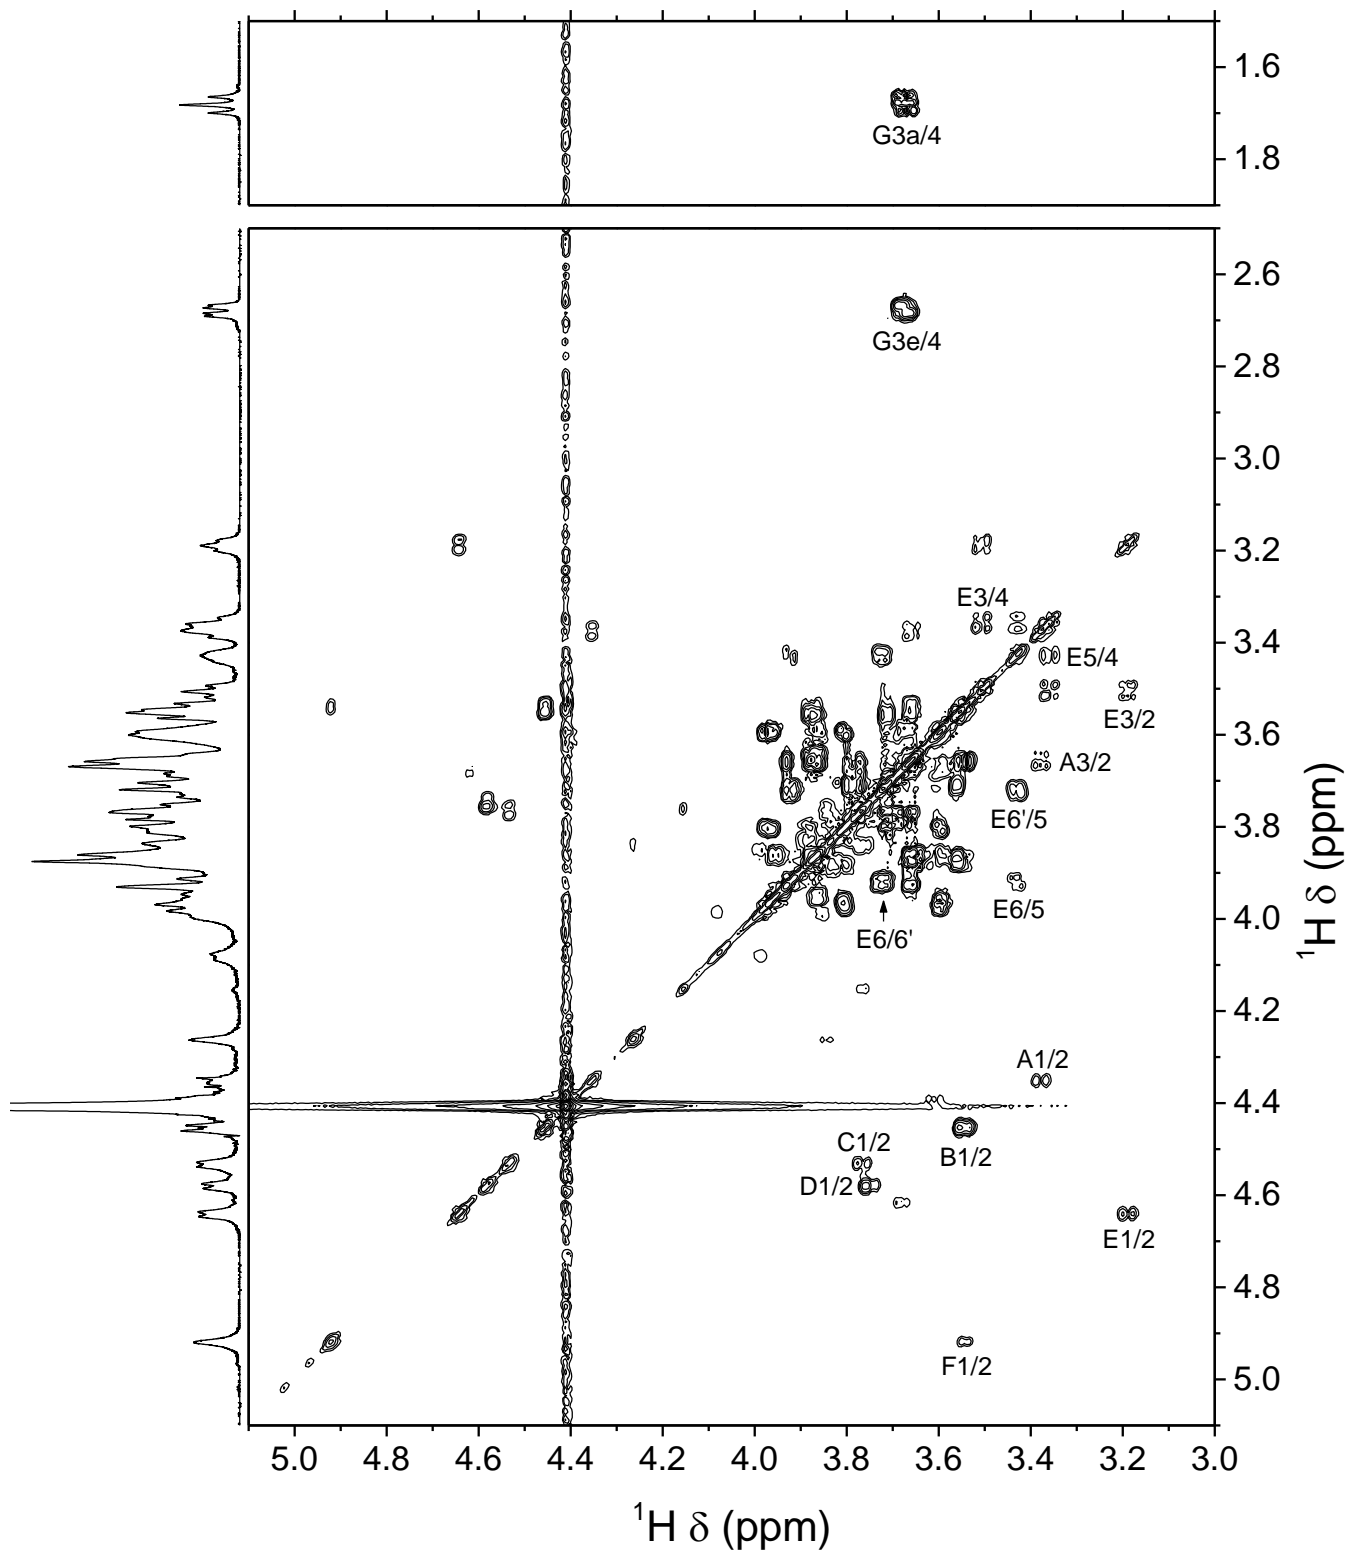

**Supplementary Figure S3. Portions of the 700-MHz 2D NMR COSY spectrum of the GBSVsia2,6 mutant CPS in 33 mM phosphate pD 8.0 in D<sub>2</sub>O at 61°C.** 512 increments of 1 K complex data points were acquired in magnitude mode with a digital resolution of 4.2 Hz/point in the  $t_2$  dimension and 8.3 Hz/point in the  $t_1$  dimension. Processing was as for [Supplementary Figure S1](#). The  $f_1$  trace corresponds to the 1D <sup>1</sup>H spectrum (see [Figure 13B](#)).

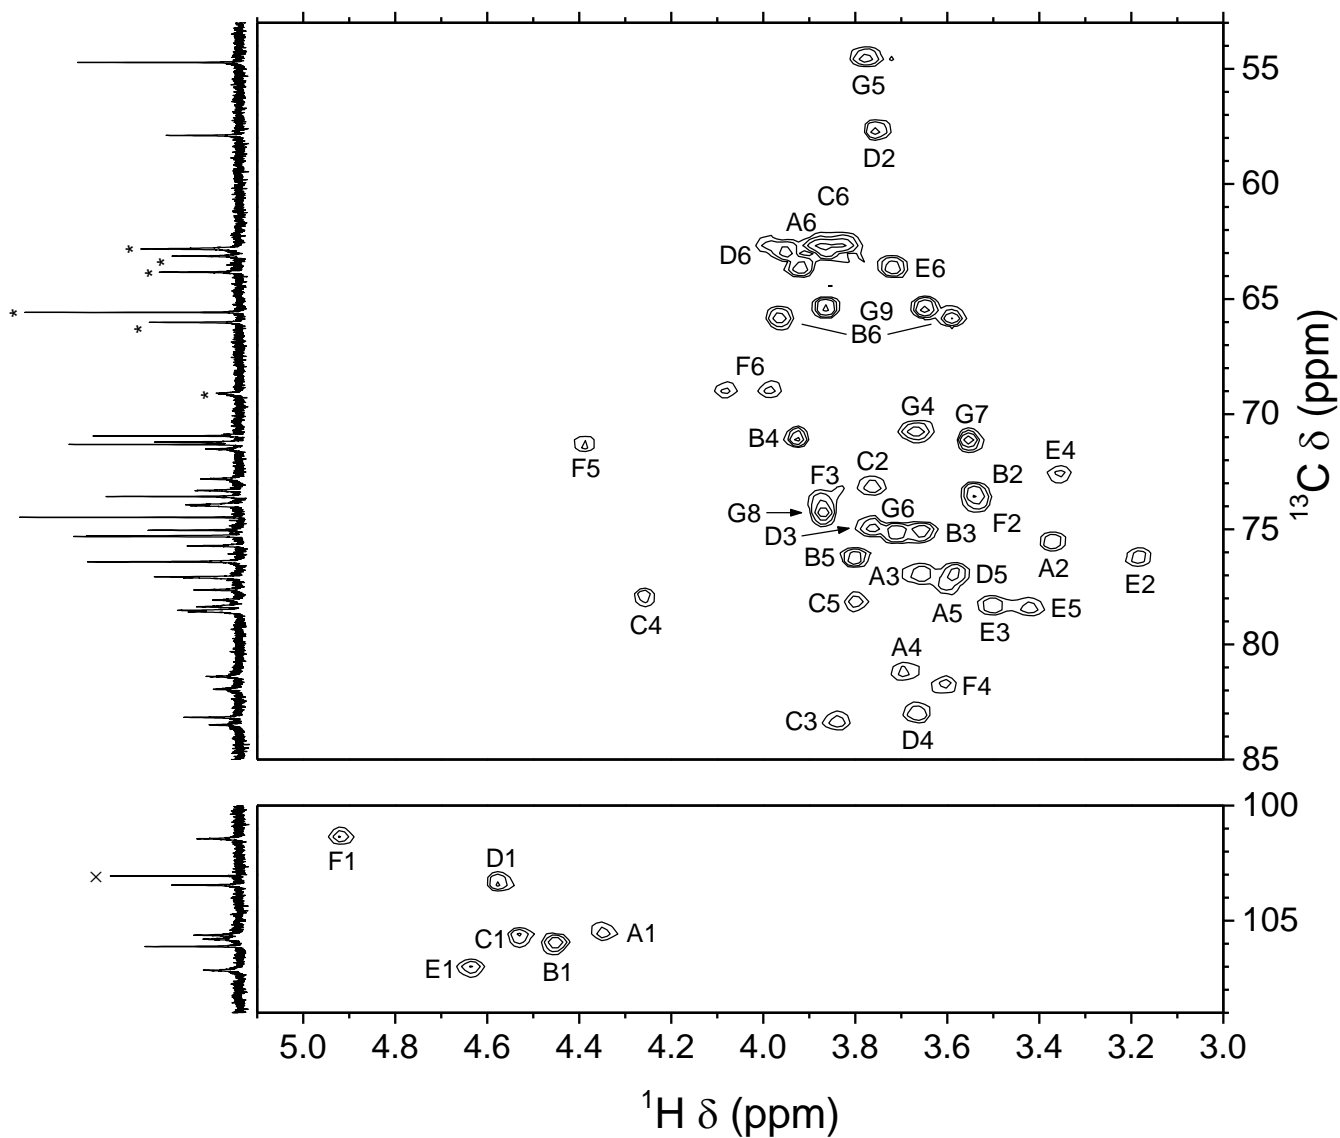

**Supplementary Figure S4. Portions of the 176-MHz ge-2D NMR HSQC spectrum of the GBSV<sub>sia2,6</sub> mutant CPS in 33 mM phosphate pD 8.0 in D<sub>2</sub>O at 61°C.**  $2 \times 200$  increments of 425 complex data points were acquired in the echo-antiecho mode with a digital resolution of 10.0 Hz/point in the  $t_2$  dimension and 79.1 Hz/point in the  $t_1$  dimension. Processing was as for [Supplementary Figure S2](#). Only positive contours are shown. The  $f_1$  trace corresponds to the 1D  $^{13}\text{C}$  spectrum. \*, signals inverted on the DEPT spectrum; x, signal absent on the DEPT spectrum.

**SUPPLEMENTARY TABLE S1.** Oligonucleotide primers used in this study.

| <b>Oligonucleotide primers, sequence (5' – 3')<sup>a</sup></b> |                                 | <b>Constructs or<br/>RT-PCR reactions</b> |
|----------------------------------------------------------------|---------------------------------|-------------------------------------------|
| cps2_ID1                                                       | CGTTGAATTTGTGGAACGGC            | p4sia2,3_2                                |
| cps2_ID2                                                       | AGTTGCTCCCTGACATCTGG            | p4sia2,3_2                                |
| cps2_ID3                                                       | GTAGCAGGTCTTGCCCCTTATC          | p4sia2,3_2                                |
| cps2_ID4                                                       | GCAAGTGTGTAGCCGAAACTG           | p4sia2,3_2                                |
| cps2_ID7                                                       | CCCAGTATCCCCCTTATTTTC           | p4sia2,3_2                                |
| cps2_ID8                                                       | CCAACAATTCGTGGTTCTCCTTCTACATAC  | p4sia2,3_2                                |
| cps2_ID9                                                       | GGTGCAAGGATTAGCCGAAATGGCAGGTAG  | p4sia2,3_2                                |
| cps2_ID10                                                      | CCATTACACGAGCGATGAAATC          | p4sia2,3_2                                |
| cpsK_5                                                         | TTTATCAGCATTAGACGAGCG           | p4sia2,3_2/14                             |
| cpsK_6                                                         | CCGGGCTGAACTTAAAGAACC           | p4sia2,3_2/14                             |
| cpsK_11                                                        | GTATGTAGAAGGAGAACCACGAATTGTTGG  | p4sia2,3_2/14                             |
| cpsK_12                                                        | CTACCTGCCATTTTCGGCTAATCCTTGCACC | p4sia2,3_2/14                             |
| sia14_ID1                                                      | CGTTGAATTTGTGGAACGGC            | p4sia2,3_14                               |
| sia14_ID2                                                      | AGTTGCTCCCTGACATCTGG            | p4sia2,3_14                               |
| sia14_ID3                                                      | GTAGCAGGTCTTGCCCCTTATC          | p4sia2,3_14                               |
| sia14_ID4                                                      | GCAAGTGTGTAGCCGAAACTG           | p4sia2,3_14                               |
| sia14_ID7                                                      | CCCAGTATCCCCCTTATTTTC           | p4sia2,3_14                               |
| sia14_ID8                                                      | CCAACAATTCGTGGTTCTCCTTCTACATAC  | p4sia2,3_14                               |
| sia14_ID9                                                      | GGTGCAAGGATTAGCCGAAATGGCAGGTAG  | p4sia2,3_14                               |
| sia14_ID10                                                     | CCATTACACGAGCGATGAAATC          | p4sia2,3_14                               |
| cpsJ_ID1                                                       | TGGTTCGACGGATAATTGTGC           | p4sia2,6_III                              |
| cpsJ_ID2                                                       | CTGCTCCCGATAAGCAAACCTC          | p4sia2,6_III                              |
| cpsL_ID3                                                       | GTTGACACAGCCACTTGCAC            | p4sia2,6_III                              |
| cpsL_ID4                                                       | CACCAGCAGCTAATAATGTCCC          | p4sia2,6_III                              |
| cpsJ_ID7                                                       | GGGTTGTCAGAAGCTAGAAAC           | p4sia2,6_III                              |
| cpsJ_ID8                                                       | TCTTGCCCTTCATCACCAACAATTCGTGGT  | p4sia2,6_III                              |
| cpsL_ID9                                                       | GTTGTCTCAGGTCTCCATTTCGTCCACTGCG | p4sia2,6_III                              |
| cpsL_ID10                                                      | CAGACACAGTGACAATGAACCG          | p4sia2,6_III                              |
| cps2L_ID5                                                      | TCTTCTGCAAGTCACCTCACC           | p4sia2,6_III                              |
| cps2L_ID6                                                      | ACGACCAATCAGGCAAACC             | p4sia2,6_III                              |
| cps2L_ID11                                                     | ACCACGAATGTGTGGTGTGAAGGGCAAGA   | p4sia2,6_III                              |
| cps2L_ID12                                                     | CGCAGTGGACGAATGGAGACCTGAGACAAC  | p4sia2,6_III                              |
| sia5_ID13                                                      | TGCAGTGGTGTATTTTAGCG            | p4sia2,6_V                                |
| sia5_ID23                                                      | TCCGTCCTTATTCCCTGTTTC           | p4sia2,6_V                                |
| sia5_ID33                                                      | GCCGGTAGAGCTATTACCATC           | p4sia2,6_V                                |
| sia5_ID43                                                      | TAACCAATTTACACCAGCAGC           | p4sia2,6_V                                |
| sia5_ID73                                                      | AGGATTAGTGTGAAGGAGAAGG          | p4sia2,6_V                                |
| 5V_8                                                           | TTGCCCTTCATCATTGACACACAAAATTAT  | p4sia2,6_V                                |
| 5V_92                                                          | GATTCATGTCTAAAATGGGATAACACATTC  | p4sia2,6_V                                |
| sia5_ID103                                                     | GTCTCCTCCCATTTATTTGAGC          | p4sia2,6_V                                |
| 5V_11                                                          | ATAATTTTGTGTGTCAATGATGAAGGGCAA  | p4sia2,6_V                                |
| 5V_122                                                         | GAATGTGTTATCCCATTTTAGACATGAATC  | p4sia2,6_V                                |
| cps2L3_ID1                                                     | GGGAGTTGGGAGTTACTATG            | p4Δcps2N                                  |

|              |                                  |                      |
|--------------|----------------------------------|----------------------|
| cps2L3_ID2   | CTGACATCTGGAAAATGCC              | p4Δcps2N             |
| cps2L3_ID3   | AATGGCAGGTAGTATCCG               | p4Δcps2N             |
| cps2L3_ID4   | GACCGTTTTTCCCTGAATG              | p4Δcps2N             |
| cps2L3_ID5   | GGTAGATACTTTCATTGCGACC           | p4Δcps2N             |
| cps2L3_ID6   | CGTGAGGGGATAGAACAAGGAAATCAGGAT   | p4Δcps2N             |
| cps2L3_ID7   | ATCCTGATTTTCTTGTCTATCCCCTCACG    | p4Δcps2N             |
| cps2L3_ID8   | GCAACAACAGATAGGAAGC              | p4Δcps2N             |
| Neu14C_ID5   | TCTCAGCTCGAAATGACTCGTC           | p4neuC               |
| Neu14C_ID8   | AGGTCCCTGACTCCGTCAAC             | p4neuC               |
| Neu5B_ID1    | TTATTGGTCTTCAGACGAGCGG           | p4Δneu5B             |
| Neu5B_ID2    | GCATCAACACCACAAGACACG            | p4Δneu5B             |
| Neu5B_ID3    | ATATTACGGTGAAGCGCCAGG            | p4Δneu5B             |
| Neu5B_ID4    | GAGGAGGTTTCGACTGGTACAC           | p4Δneu5B             |
| Neu5B_ID5    | TTCGGTTCATTGTCACTGTGTC           | p4Δneu5B             |
| Neu5B_ID6    | GCGTGAATCACGAATGCAACCAATCTCTGC   | p4Δneu5B             |
| Neu5B_ID7    | GCAGAGATTGGTTGCATTCGTGATTCACGC   | p4Δneu5B             |
| Neu5B_ID8    | AGTACCGCTTTCATCTGCTCTC           | p4Δneu5B             |
| cps5K_ID1    | AGGATTAGTGTGAAGGAGAAGG           | p4Δcps5K             |
| cps5K_ID2    | TTTGTAAGTGTCCCGATAAGC            | p4Δcps5K             |
| cps5K_ID3    | TTTAGTGGGGCTACCTCATGAC           | p4Δcps5K             |
| cps5K_ID4    | AGCGCCATAGGCTGCATAATG            | p4Δcps5K             |
| cps5K_ID5    | GAAGATGCAATCGAGAGAATGG           | p4Δcps5K             |
| cps5K_ID6    | CGCGGTGGACGAATGCGTGATAGTGCACA    | p4Δcps5K             |
| cps5K_ID7    | TGTGACACTATCACGCATTCGTCCACCGCG   | p4Δcps5K             |
| cps5K_ID8    | TCCAAGCGAATAACCGAAAC             | p4Δcps5K             |
| cpsN_pstI_F  | GCGCCTGCAGTATCGAAGCTGTACAGGG     | pMXcpsN              |
| cpsN_EcoRI_R | CGCGGAATTCCGAGACCTGAGACAACCTATTG | pMXcpsN              |
| M2000F       | GATAGTTTGTGAGCCAGTGG             | RT-PCR (R1)          |
| cpsA_R       | GCCAATACTGCCACTCCTAC             | RT-PCR (R1)          |
| M1000F       | CTGATTGCACCGATTCCGAG             | RT-PCR (R3)          |
| cpsA_R       | GCCAATACTGCCACTCCTAC             | RT-PCR (R3)          |
| M500F        | CAATTCTGCCAATCCCTCTTG            | RT-PCR (R4)          |
| cpsA_R       | GCCAATACTGCCACTCCTAC             | RT-PCR (R4)          |
| cpsA_F       | GTCAAGCGATGGTGTTC AAC            | RT-PCR (R5)          |
| cpsB_R       | CACCGGCTTCAACATTTTG              | RT-PCR (R5)          |
| cpsB_F       | GCGGCACGTATTGCAAATAG             | RT-PCR (R6)          |
| cpsD_R       | GCACGAGCCATTAAGTGTTG             | RT-PCR (R6)          |
| cpsD_F       | GGCAGTAGCAGAAGTTTATCC            | RT-PCR (R7)          |
| cpsF_R       | GTAGCCATTCATGACCGTC              | RT-PCR (R7)          |
| cpsF_F       | GTTGGACGATTTGTGCCTG              | RT-PCR (R8)          |
| cpsG_R       | ACAGCCTGTGAAACTGTCAC             | RT-PCR (R8)          |
| cpsF3_F      | TTTTCATGGTACGAGGTTG              | RT-PCR (R9)          |
| cpsH_R       | GTGTGATGTCCCATCGATAGC            | RT-PCR (R9)          |
| cpsH_F       | GCGAGAGAAGCCTCTTATTC             | RT-PCR (R10)         |
| cpsJ_R       | CATTCCTAAGTCTCGCACC              | RT-PCR (R10)         |
| cpsJ_F       | GATAGTGATTTGTGCGGGAGGG           | RT-PCR (R11)         |
| cpsK_R       | GCCATAATTACGGGCATCTG             | RT-PCR (R11)         |
| cpsK_F       | CGCCAAGGGTGACTACTTAG             | RT-PCR (R12)         |
| cpsN_R       | CGAGCGACAGATCATTGACC             | RT-PCR (R12)         |
| cpsN_F       | GCTCGTACAATTTGACGAGG             | RT-PCR (R13 and R14) |
| cpsO_R       | CAGGCAAACCAAATAGGAGC             | RT-PCR (R13)         |
| neu1_R       | ATCGGTCGTTCCATTTTCTCTG           | RT-PCR (R14 and R15) |
| cpsO_F       | CGCTCCTATTTGGTTTGCC              | RT-PCR (R15)         |
| neu2_F       | GGAAAAAATTGGTTCGTC AAGC          | RT-PCR (R16)         |
| neu2_R       | TGGCAACTGGTAGCATCTC              | RT-PCR (R16)         |
| neu3_F       | CCTTGACAGAGCAACTCAC              | RT-PCR (R17)         |

|         |                         |                                        |
|---------|-------------------------|----------------------------------------|
| neu3_R  | ACCAAGGAAGGACACCATC     | RT-PCR (R17)                           |
| neu4_F  | GGCCTCAACCATGAAAGAG     | RT-PCR (R18)                           |
| neu4_R  | GTTGTAATAATCTGTCGCAAG   | RT-PCR (R18)                           |
| neu5_F  | TTTTCCATACCATTGAGCTG    | RT-PCR (R19)                           |
| neu5_R  | TGCTCTGCTTTGGAAACAAG    | RT-PCR (R19)                           |
| neu6_F  | ATCGGTGGGATGACAGCTTC    | RT-PCR (R21, R22, R23,<br>R24 and R25) |
| neu6_R  | TCCTTTTCACGACCTGACTTG   | RT-PCR (R21)                           |
| neu6R_R | TGGTCAAACCTTGTCAAAATC   | RT-PCR (R22)                           |
| neu8R_R | TACTTGTTGCGGAAGTTAGAGCC | RT-PCR (R23)                           |

---

<sup>a</sup> *Oligonucleotide primers were from IDT (Coralville, IA); restriction sites are underlined.*



**SUPPLEMENTARY TABLE S2.** <sup>1</sup>H and <sup>13</sup>C NMR chemical shifts of the GBSIII<sub>sia2,6</sub> mutant CPS<sup>a</sup>.

| <b>Residue</b> |                      | <b>1</b>       | <b>2</b>                    | <b>3</b>      | <b>4</b>      | <b>5</b>      | <b>6</b>      | <b>7</b>     | <b>8</b>      | <b>9</b>      | <b>CH<sub>3</sub></b> | <b>CO</b>     |                |
|----------------|----------------------|----------------|-----------------------------|---------------|---------------|---------------|---------------|--------------|---------------|---------------|-----------------------|---------------|----------------|
| A              | →3)-β-D-Gal-(1→      | 4.45<br>105.65 | (7.7) <sup>b</sup><br>72.76 | 3.62<br>84.96 | 3.72<br>70.93 | 4.15<br>77.60 | 3.71<br>63.65 | 3.79<br>3.76 |               |               |                       |               |                |
| B              | →6)-β-D-Gal-(1→      | 4.49<br>105.96 | (8.8)<br>73.56              | 3.54<br>75.29 | 3.66<br>71.24 | 3.93<br>76.33 | 3.79<br>66.01 | 3.96<br>3.60 |               |               |                       |               |                |
| C              | →4)-β-D-Glc-(1→      | 4.53<br>105.34 | (7.8)<br>75.51              | 3.38<br>77.12 | 3.65<br>81.53 | 3.64<br>77.48 | 3.59<br>63.05 | 3.97<br>3.80 |               |               |                       |               |                |
| D              | →3,6)-β-D-GlcNAc-(1→ | 4.76<br>105.18 | 3.78<br>57.90               | 3.78<br>74.81 | 3.78<br>82.53 | 3.74<br>75.93 | 4.24<br>70.67 | 3.96         |               |               | 2.05<br>25.07         | 177.45        |                |
| E              | α-D-Neu5Ac-(2→       | 175.97         | 103.03                      | 2.68<br>42.82 | 1.69<br>71.34 | 3.67<br>54.72 | 3.78<br>75.29 | 3.70         | 3.55<br>70.93 | 3.87<br>74.46 | 3.86<br>65.58         | 3.65<br>24.77 | 2.03<br>177.64 |

<sup>a</sup> Chemical shifts (<sup>1</sup>H, top; <sup>13</sup>C, bottom) at 65°C in 33 mmol/L phosphate buffer pD 8.0 in D<sub>2</sub>O in ppm referenced to internal DSS. <sup>1</sup>H chemical shifts were obtained from the 1D, COSY, TOCSY, or HSQC spectrum. <sup>13</sup>C chemical shifts were obtained from the 1D spectrum.

<sup>b</sup> Coupling constants ( $J_{H_1-H_2}$ ) in parentheses.

**SUPPLEMENTARY TABLE S3.** <sup>1</sup>H and <sup>13</sup>C NMR chemical shift differences between the GBSIII<sub>sia2,6</sub> mutant and wild-type GBS type III CPSs<sup>a</sup>.

| <b>Residue</b> | <b>1</b> | <b>2</b> | <b>3</b> |       | <b>4</b> | <b>5</b> | <b>6</b> |       | <b>7</b> | <b>8</b> | <b>9</b> |       |
|----------------|----------|----------|----------|-------|----------|----------|----------|-------|----------|----------|----------|-------|
| A              | 0.01     | 0.02     | 0.00     |       | -0.03    | -0.01    | -0.01    | 0.01  |          |          |          |       |
|                | -0.20    | 0.01     | -0.29    |       | -0.09    | -0.11    | -0.15    |       |          |          |          |       |
| B              | -0.14    | -0.04    | -0.45    |       | -0.05    | 0.09     | 0.18     | -0.15 |          |          |          |       |
|                | 1.16     | 1.40     | -3.23    |       | 0.88     | -1.45    | 2.32     |       |          |          |          |       |
| C              | -0.02    | 0.01     | -0.03    |       | -0.04    | -0.09    | -0.04    | -0.02 |          |          |          |       |
|                | -0.03    | 0.16     | 0.07     |       | 0.37     | 0.02     | 0.26     |       |          |          |          |       |
| D              | 0.05     | -0.04    | 0.05     |       | -0.16    | 0.02     | -0.06    | -0.01 |          |          |          |       |
|                | -0.72    | -0.04    | 0.03     |       | 3.20     | 0.10     | 0.52     |       |          |          |          |       |
| E              |          |          | -0.09    | -0.14 | -0.03    | -0.09    | 0.03     |       | -0.07    | -0.03    | -0.03    | -0.02 |
|                | -0.66    | 0.18     | 0.40     |       | 0.17     | 0.27     | -0.48    |       | 0.18     | -0.14    | 0.23     |       |

<sup>a</sup> Chemical shift differences (<sup>1</sup>H, top; <sup>13</sup>C, bottom) in ppm. Data for the wild-type GBS type III 14-repeating unit polysaccharide from Brisson *et al.* (1997). Brisson, J. R., Uhrinova, S., Woods, R. J., van der Zwan, M., Jarrell, H. C., Paoletti, L. C., *et al.* (1997). NMR and molecular dynamics studies of the conformational epitope of the type III group B *Streptococcus capsular polysaccharide* and derivatives. *Biochemistry* 36, 3278–3292. doi: 10.1021/bi961819l

**SUPPLEMENTARY TABLE S4.**  $^1\text{H}$  and  $^{13}\text{C}$  NMR chemical shifts of the GBSV<sub>sia2,6</sub> mutant CPS<sup>a</sup>.

| Residue |                    | 1      | 2                  | 3                  | 4     | 5     | 6     | 7     | 8     | 9     | CH <sub>3</sub> | CO     |      |
|---------|--------------------|--------|--------------------|--------------------|-------|-------|-------|-------|-------|-------|-----------------|--------|------|
| A       | →4)-β-D-Glc-(1→    | 4.35   | 3.38               | 3.66               | 3.70  | 3.61  | 3.99  | 3.85  |       |       |                 |        |      |
|         |                    | 105.63 | 75.72              | 77.11              | 81.39 | 77.63 | 62.82 |       |       |       |                 |        |      |
| B       | →6)-β-D-Gal-(1→    | 4.45   | (7.7) <sup>b</sup> | 3.55               | 3.66  | 3.93  | 3.81  | 3.97  | 3.60  |       |                 |        |      |
|         |                    | 106.12 | 73.58              | 75.29              | 71.21 | 76.41 | 66.01 |       |       |       |                 |        |      |
| C       | →3,4)-β-D-Gal-(1→  | 4.53   | (7.1)              | 3.77               | 3.85  | 4.26  | 3.81  | 3.88  | 3.84  |       |                 |        |      |
|         |                    | 105.81 | 73.31              | 83.49              | 78.08 | 78.36 | 62.82 |       |       |       |                 |        |      |
| D       | →4)-β-D-GlcNAc-(1→ | 4.58   | (7.6)              | 3.76               | 3.77  | 3.67  | 3.59  | 3.96  | 3.87  |       | 2.10            |        |      |
|         |                    | 103.45 | 57.89              | 75.04              | 83.17 | 77.06 | 63.13 |       |       |       | 25.53           | 176.67 |      |
| E       | β-D-Glc-(1→        | 4.64   | (7.4)              | 3.19               | 3.51  | 3.36  | 3.43  | 3.93  | 3.73  |       |                 |        |      |
|         |                    | 107.15 | 76.41              | 78.52              | 72.81 | 78.59 | 63.83 |       |       |       |                 |        |      |
| F       | α-D-Glc-(1→        | 4.92   |                    | 3.54               | 3.88  | 3.61  | 4.39  | 4.08  | 3.99  |       |                 |        |      |
|         |                    | 101.44 | 73.98 <sup>c</sup> | 73.93 <sup>c</sup> | 81.96 | 71.51 | 69.09 |       |       |       |                 |        |      |
| G       | α-D-Neu5Ac-(2→     |        |                    | 2.68               | 1.68  | 3.67  | 3.78  | 3.71  | 3.56  | 3.88  | 3.87            | 3.65   | 2.04 |
|         |                    | 175.98 | 103.06             | 42.84              | 70.94 | 54.72 | 75.31 | 71.32 | 74.48 | 65.78 | 24.86           | 177.66 |      |

<sup>a</sup> Chemical shifts ( $^1\text{H}$ , top;  $^{13}\text{C}$ , bottom) at 61°C in 33 mmol/L phosphate buffer pH 8.0 in D<sub>2</sub>O in ppm referenced to internal DSS.  $^1\text{H}$  chemical shifts were obtained from the 1D, COSY, TOCSY, or HSQC spectrum.  $^{13}\text{C}$  chemical shifts were obtained from the 1D spectrum.

<sup>b</sup> Coupling constants ( $J_{\text{H-1-H-2}}$ ) in parentheses.

<sup>c</sup> Tentative assignments.
